# Supplementary material for: Frontline Screening for SARS-CoV-2 Infection at Emergency Department Admission by Third Generation Rapid Antigen Test: Can We Spare RT-qPCR?
Source: MDPI journal article supplement (doi:10.3390/v13050818), 2021-05-01
Supplement: s1 [file s1]

**Supplementary Figure 1.** Selection criteria for the 960 swab samples included in the study and concordance between RT-qPCR and LumiraDx.

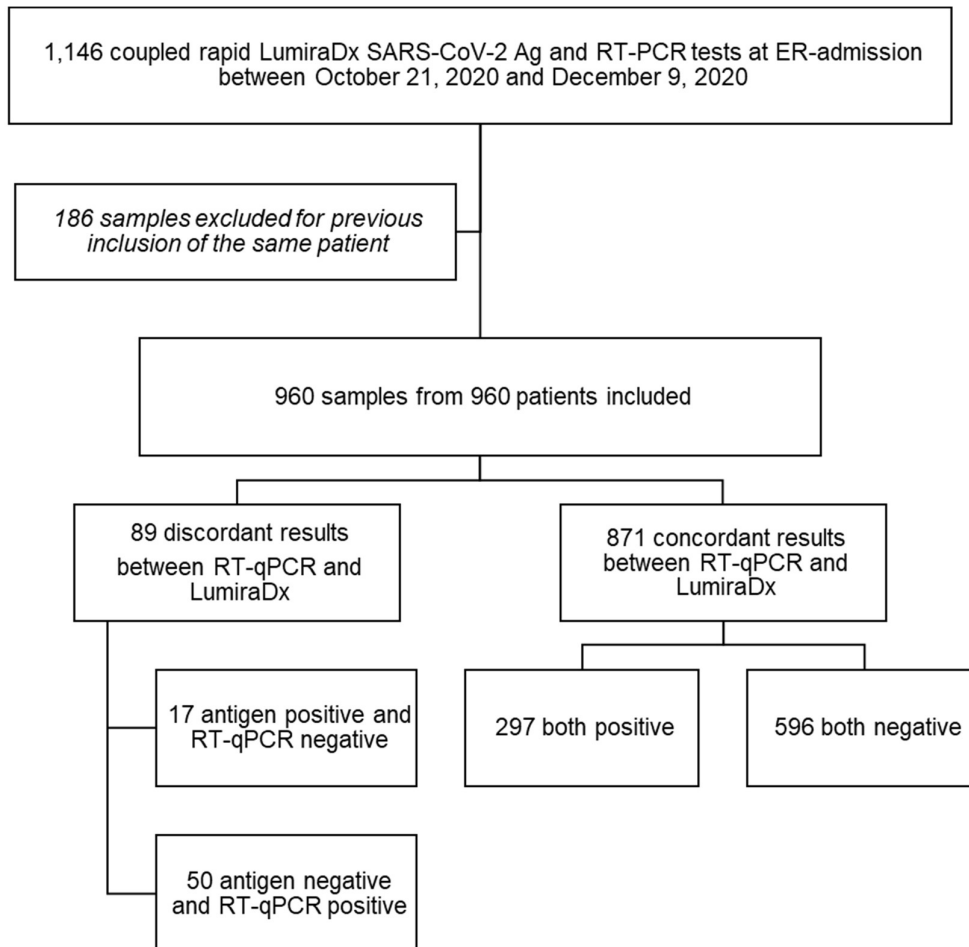

**Supplementary Table 1.** Factors associated with the presence of SARS-CoV-2 subgenomic RNAs

|                                                                          | Presence of SARS-CoV-2 subgenomic E and N mRNA |         |                                  |         |
|--------------------------------------------------------------------------|------------------------------------------------|---------|----------------------------------|---------|
|                                                                          | Univariate analysis                            |         | Multivariate analysis            |         |
|                                                                          | Odds ratio (95% CI) <sup>a</sup>               | P-value | Odds ratio (95% CI) <sup>a</sup> | P-value |
| <b>Delay between symptoms onset and SARS-CoV-2 diagnosis<sup>b</sup></b> | 0.25 (0.05-1.25)                               | 0.092   | 2.74 (0.20-37.11)                | 0.449   |
| <b>Severity of COVID-19 presentation, n (%)<sup>c</sup></b>              |                                                |         |                                  |         |
| Mild (N=14)                                                              | Ref.                                           | -       | Ref.                             | -       |
| Moderate (N=15)                                                          | 0.51 (0.11-2.36)                               | 0.392   | 1.01 (0.11-8.87)                 | 0.991   |
| Severe (N=29)                                                            | 0.90 (0.17-4.70)                               | 0.901   | 0.70 (0.05-9.48)                 | 0.795   |
| Critical (N=9)                                                           | 0.20 (0.01-2.87)                               | 0.237   | 0.11 (0.00-7.37)                 | 0.308   |
| <b>SARS-CoV-2 genomic RNA (copies/mL), median (IQR)<sup>d</sup></b>      | 1.0 (1.0-1.0)                                  | 0.750   | 1.00 (1.00-1.00)                 | 0.02    |

Odds ratio (95% CI) for subgenomic E or N mRNA production by univariate and multivariate logistic regression analysis are shown. <sup>a</sup> Related to the risk of being positive for E and/or N subgenomic mRNAs. <sup>b</sup> Self-reported and per day increase. <sup>c</sup> Classified according to WHO grading(18). <sup>d</sup> Per 1 Log<sub>10</sub> increase. CI= Confidence interval; COVID-19= Coronavirus Disease 2019; IQR= interquartile range; N = number; SARS-CoV-2= Severe Acute Respiratory Syndrome Coronavirus 2.
